# Supplementary material for: Spray Coated Colloidal Quantum Dot Films for Broadband Photodetectors
Source: MDPI journal article supplement (doi:10.3390/nano9121738), 2019-12-06
Supplement: s1 [file s1]

# Supplementary materials

## Spray Coated Colloidal Quantum Dot Films for Broadband Photodetectors

Kaixuan Song <sup>1</sup>, Jifeng Yuan <sup>1</sup>, Ting Shen <sup>1</sup>, Jiuyao Du <sup>1</sup>, Ruiqi Guo <sup>1</sup>, Tönu Pullerits <sup>2</sup> and Jianjun Tian <sup>1,\*</sup>

<sup>1</sup> Institute for Advanced Materials and Technology, University of Science and Technology Beijing, Beijing 100083, China; (K.S. songkx1969931415@163.com); (J.Y. 13301203163@163.com); (T.S. shentingustb@163.com); (J.D. jiuyaodu@163.com); (R.G. ruiqiguo1217@163.com)

<sup>2</sup> Department of Chemical Physics and NanoLund, Lund University, Box 124, 22100 Lund, Sweden; tonu.pullerits@chemphys.lu.se

\* Correspondence: tianjianjun@mater.ustb.edu.cn

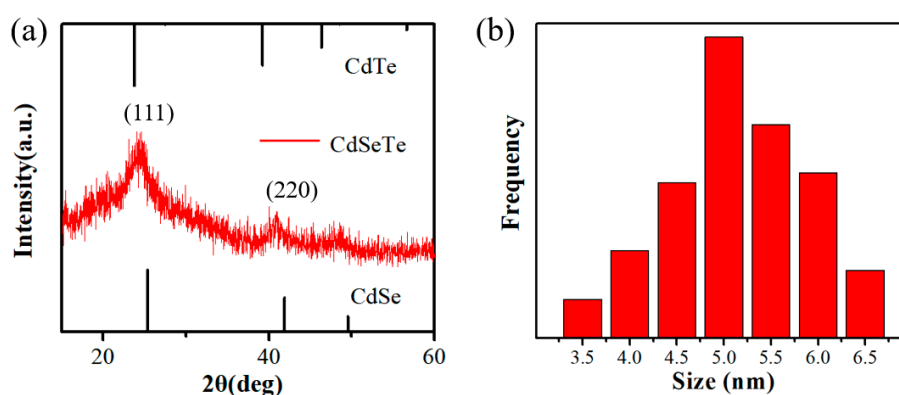

**Figure S1.** (a) XRD pattern and (b) size distribution histogram of CdSeTe QDs.

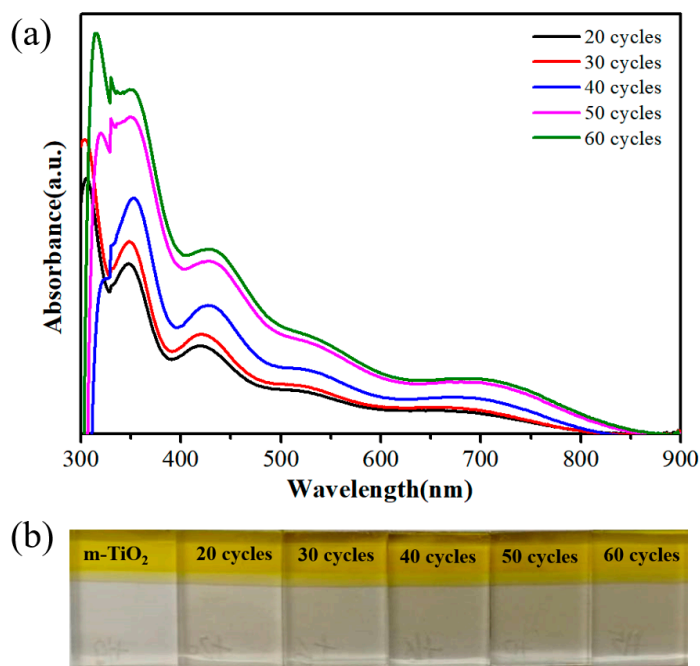

**Figure S2.** (a) The UV-vis absorption spectrum and (b) photograph of QDs films fabricated by spray coating with different deposition cycles.

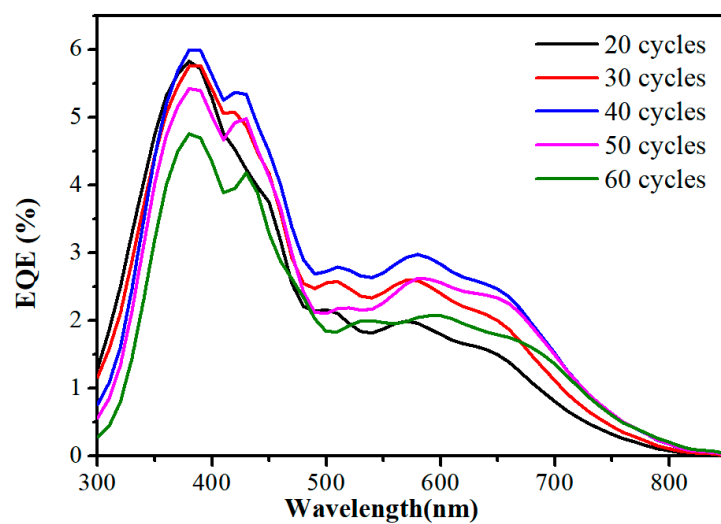

**Figure S3.** External quantum efficiency (EQE) spectra of photodetectors with different spray coating cycles.

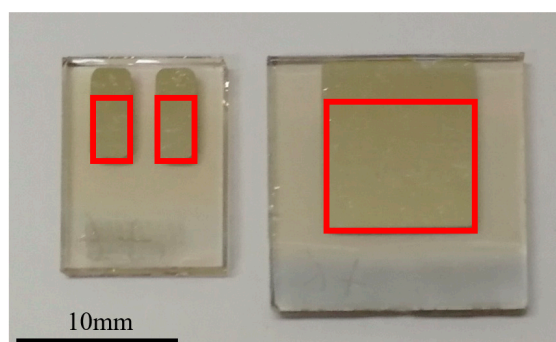

**Figure S4.** Contrast photograph of different sizes of photodetectors (the area circled in red is the active area).

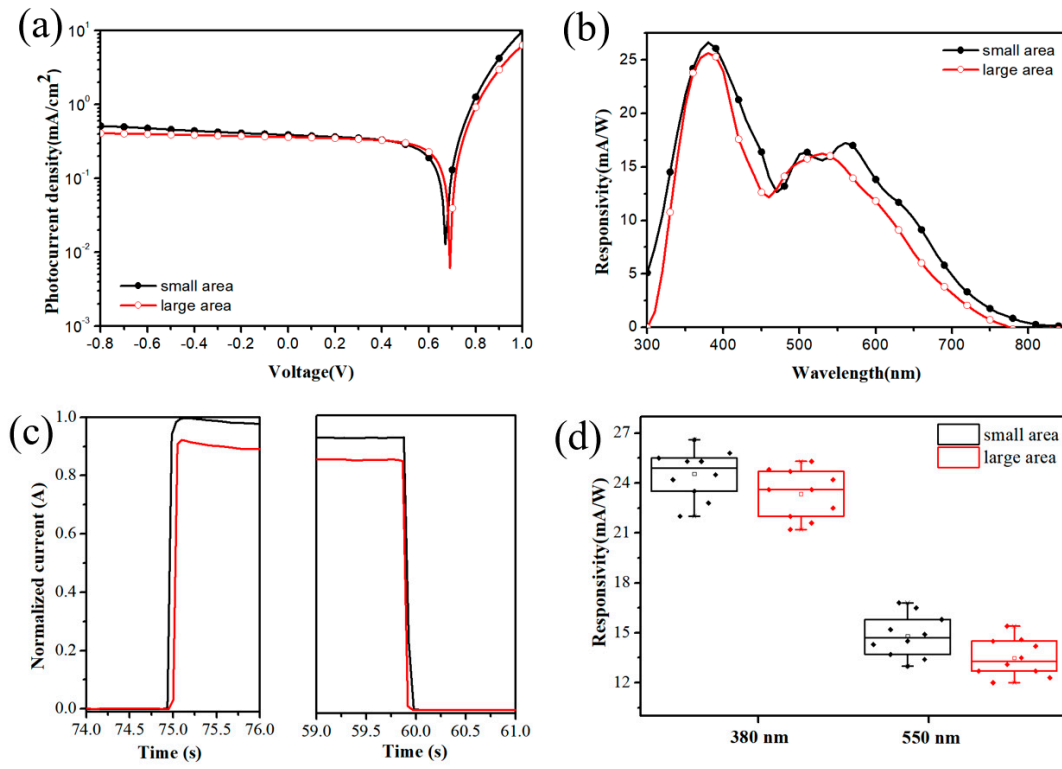

**Figure S5.** Current density-voltage curves of devices under light conditions. (b) The spectroscopic response of the devices of different sizes. (c) The normalized current of rise and decay time of different-size devices. (d) Statistical responsivity distribution for the different-size detectors at the wavelength of 380 nm and 550 nm.
